# Supplementary material
Source: PubMed Central journal article supplement (PMC2718850)

**Hela**

**Control**

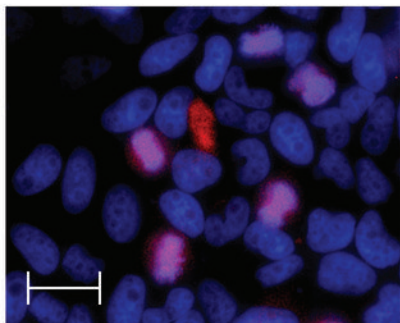

**Separase overexpressed**

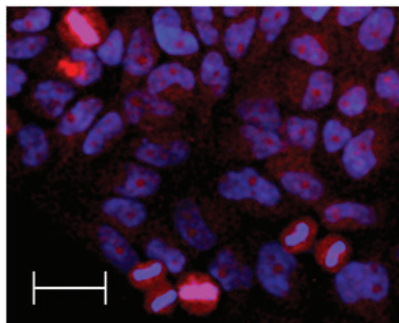

**FSK3**

**uninduced**

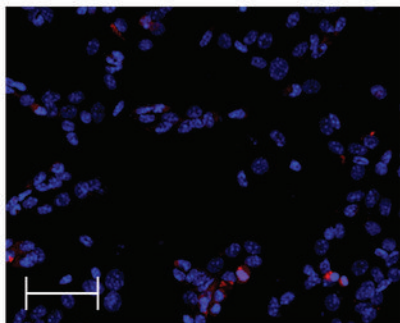

**Separase induced**

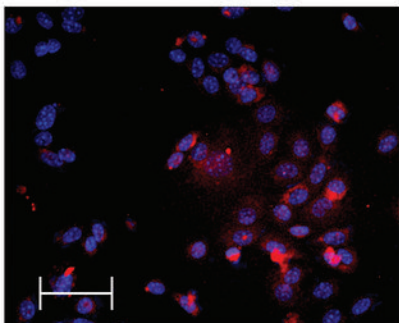

Supplement: NIHMS111090-supplement-01.pdf [file NIHMS111090-supplement-01.pdf]
